# Supplementary material
Source: HighWire-hosted journal article supplement (http://ajnr-stage2.highwire.org/highwire/filestream/97741/field_highwire_adjunct_files/0/0362.pdf)
Supplement: 0362.pdf [file 0362.pdf]

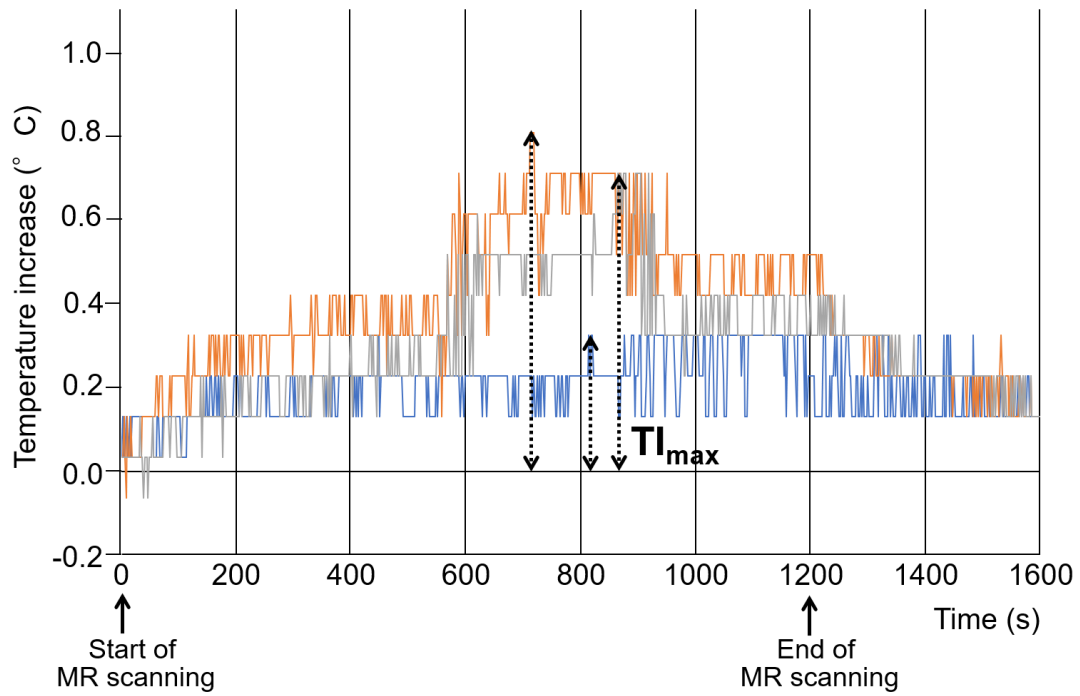

**On-line Fig. 1** Chronological changes in temperature increase (TI) at three locations for the right-angled clip. TI (°C) indicates the difference between temperature before magnetic resonance (MR) scanning and during or after MR scanning (latter - former). Blue, orange, and grey lines denote TI at the tip of the clip head, angled part of the clip, and 5 mm from the tip of the clip head, respectively.  $TI_{max}$  denotes maximum TI at each location.

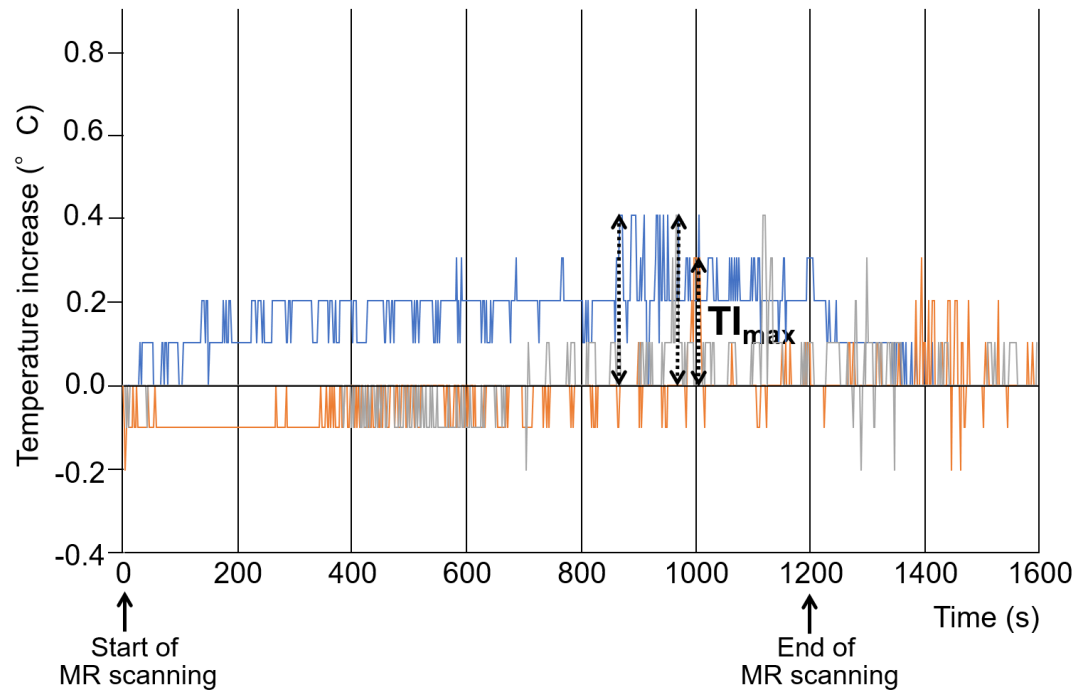

**On-line Fig. 2** Chronological changes in temperature increase (TI) at three locations for the short straight clip. TI (°C) indicates the difference between temperature before magnetic resonance (MR) scanning and during or after MR scanning (latter - former). Blue, orange, and grey lines denote TI at the tip of the clip head, tip of the clip blade, and 5 mm from the tip of the clip blade, respectively. TI<sub>max</sub> denotes maximum TI at each location.

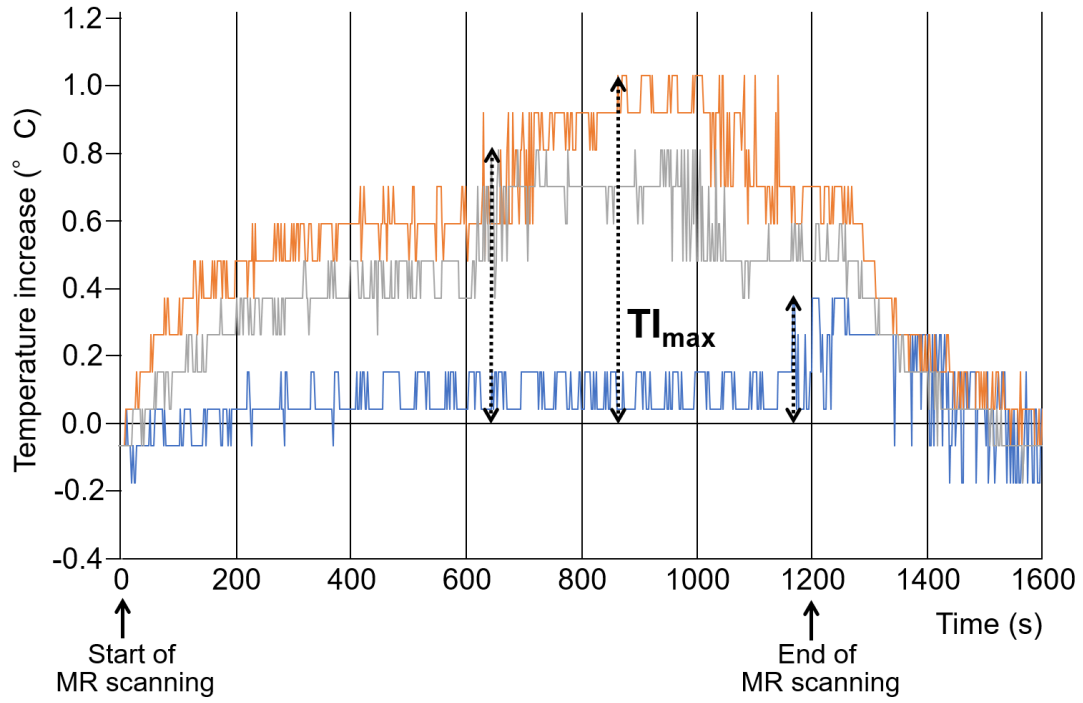

**On-line Fig. 3** Chronological changes in temperature increase (TI) at three locations for the 45°-angled clip. TI (°C) indicates the difference between temperature before magnetic resonance (MR) scanning and during or after MR scanning (latter - former). Blue, orange, and grey lines denote TI at the tip of the clip head, angled part of the clip, and 5 mm from the tip of the clip head, respectively.  $TI_{max}$  denotes maximum TI at each location.

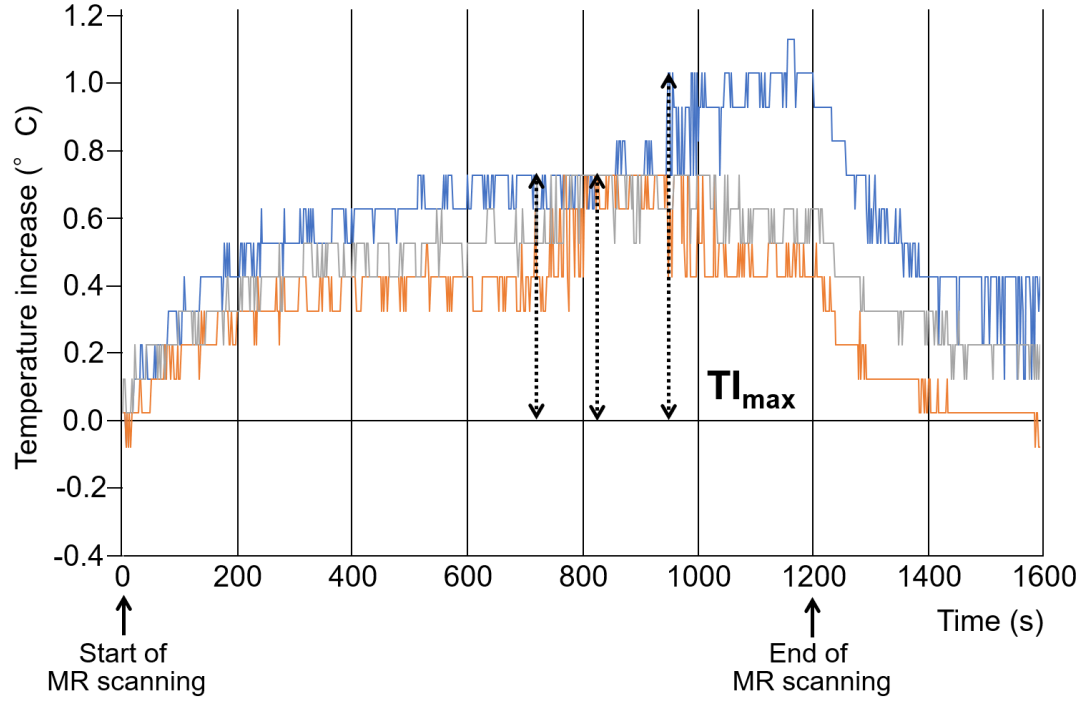

**On-line Fig. 4** Chronological changes in temperature increase (TI) at three locations for the straight fenestrated clip. TI (°C) indicates the difference between temperature before magnetic resonance (MR) scanning and during or after MR scanning (latter - former). Blue, orange, and grey lines denote TI at the tip of the clip head, tip of the clip blade, and 5 mm from the tip of the clip blade, respectively.  $TI_{max}$  denotes maximum TI at each location.
